# Supplementary material for: Population Genetics of Anopheles coluzzii Immune Pathways and Genes
Source: PubMed Central journal article supplement (PMC4349087; doi:10.1534/g3.114.014845), 2014-12-30
Supplement: supp_g3.114.014845_014845SI.pdf [file supp_g3.114.014845_014845SI.pdf]

**Population Genetics of *Anopheles coluzzii* immune pathways and genes.**

Susan M. Rottschaefer\*, Jacob E. Crawford<sup>§</sup>, Michelle M. Riehle<sup>†</sup>, Wamdaogo M. Guelbeogo<sup>‡</sup>, Awa Gneme<sup>‡</sup>, N’Fale Sagnon<sup>‡</sup>, Kenneth D. Vernick<sup>†\*\*</sup>, Brian P. Lazzaro\*

\*Department of Entomology, Cornell University, Ithaca, NY 14853, <sup>§</sup>Department of Integrative Biology, University of California, Berkeley, Berkeley, CA 94720, <sup>†</sup>Department of Microbiology, University of Minnesota, St. Paul, MN 55108, <sup>‡</sup>Centre National de Recherche et de Formation sur le Paludisme, 01 BP 2208 Ouagadougou, Burkina Faso, <sup>\*\*</sup>Unit of Insect Vector Genetics and Genomics, Institut Pasteur, Paris, France.

**Corresponding Author:** Susan M. Rottschaefer , Department of Entomology, Cornell University, Ithaca, NY 14853. E-mail: [smr53@cornell.edu](mailto:smr53@cornell.edu)

DOI: 10.1534/g3.114.014845

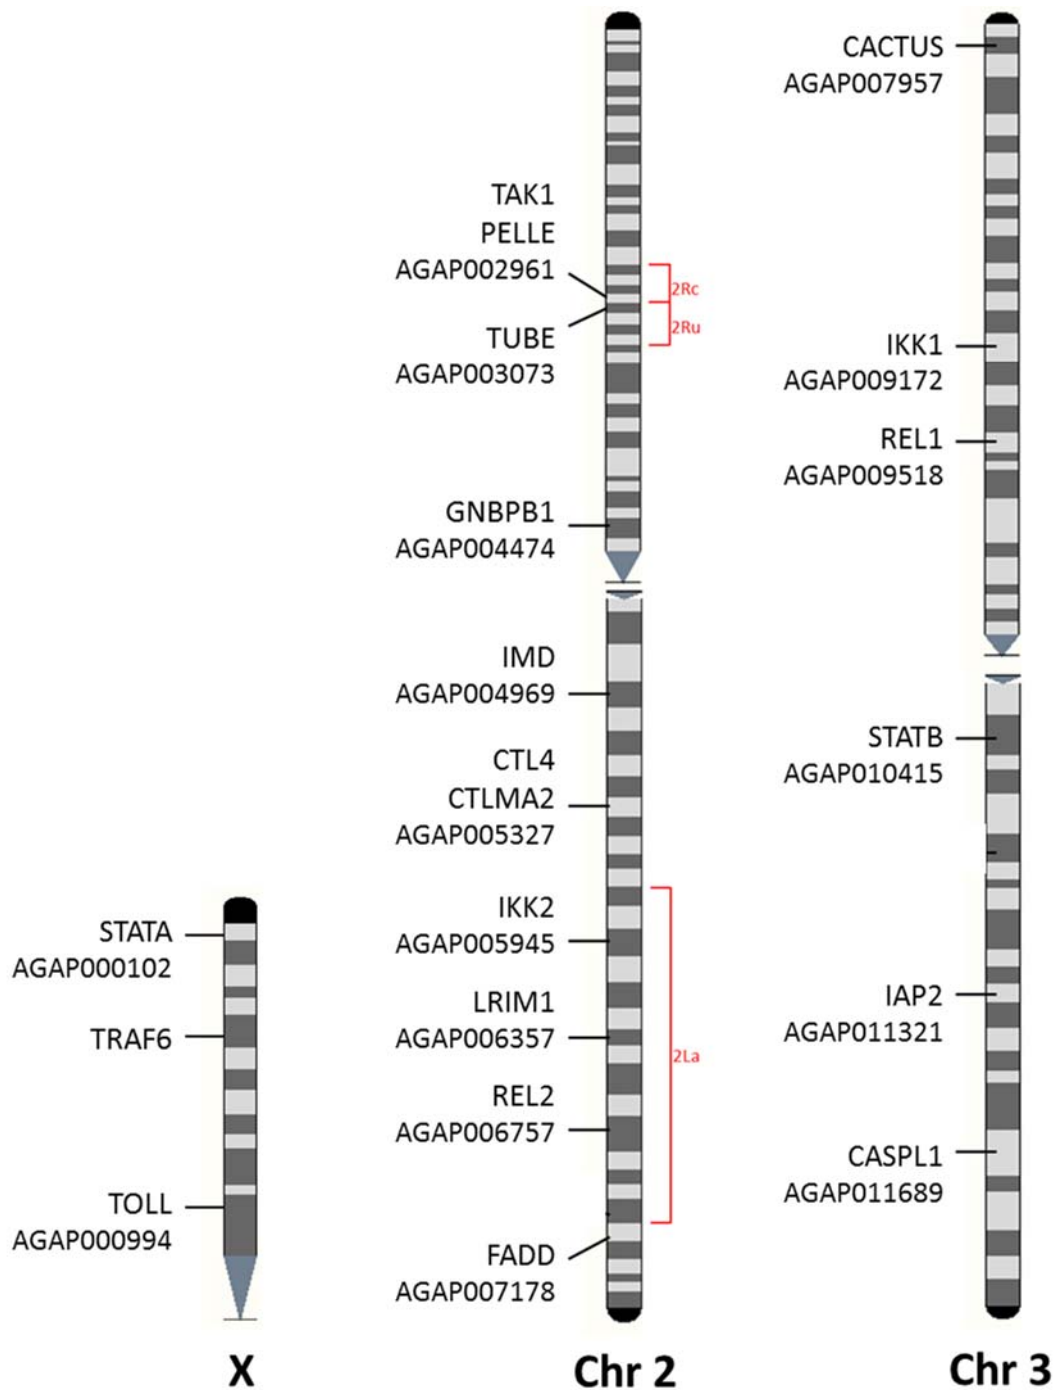

**Figure S1** Approximate chromosomal locations of loci sampled. AGAP identifiers are provided for all non-immune control loci. Control loci are located within 40-100KB of their “matched” controls. Positions of chromosomal inversions are shown in red.

**Table S1 Population genetic statistics for all sampled loci**

| locus      | $N^a$ | Sites <sup>b</sup> | S <sup>c</sup> | $\Pi_{total}^d$ | $\Pi_s^e$ | $\Pi_a^f$ | $D^g$  | $K_{total}^h$ | $K_s^i$ | $K_A^j$ | $K_A/K_S^k$ |
|------------|-------|--------------------|----------------|-----------------|-----------|-----------|--------|---------------|---------|---------|-------------|
| CACTUS     | 20    | 2660               | 133            | 0.0132          | 0.0215    | 0.0021    | -0.201 | 0.0247        | 0.047   | 0.0016  | 0.033       |
| CASPL1     | 19    | 1424               | 133            | 0.024           | 0.0608    | 0.0116    | -0.385 | 0.0269        | 0.061   | 0.0134  | 0.212       |
| CTL4       | 20    | 882                | 44             | 0.0125          | 0.0311    | 0.0039    | -0.263 | 0.0326        | 0.06    | 0.0147  | 0.237       |
| CTLMA2     | 20    | 891                | 55             | 0.0217          | 0.0258    | 0.0084    | 1.254  | 0.047         | 0.1021  | 0.0204  | 0.188       |
| FADD       | 20    | 980                | 124            | 0.0294          | 0.0458    | 0.0149    | -0.601 | 0.0447        | 0.0663  | 0.0248  | 0.363       |
| GNBPB1     | 20    | 1782               | 79             | 0.0102          | 0.0202    | 0.0013    | -0.697 | 0.0334        | 0.0773  | 0.0064  | 0.078       |
| IAP2       | 20    | 873                | 78             | 0.0253          | 0.0451    | 0.006     | 0.3    | 0.0467        | 0.0783  | 0.0131  | 0.16        |
| IKK1       | 20    | 2681               | 170            | 0.0141          | 0.0336    | 0.0051    | -0.987 | 0.0294        | 0.0728  | 0.0077  | 0.102       |
| IKK2       | 20    | 2035               | 98             | 0.0119          | 0.0373    | 0.0043    | 0.116  | 0.037         | 0.0795  | 0.0082  | 0.098       |
| IMD        | 20    | 1270               | 65             | 0.0116          | 0.0195    | 0.005     | -0.804 | 0.0328        | 0.0481  | 0.0215  | 0.439       |
| LRIM1      | 20    | 1636               | 76             | 0.0106          | 0.0265    | 0.0055    | -0.892 | 0.0302        | 0.0638  | 0.0179  | 0.272       |
| PELLE      | 20    | 1986               | 87             | 0.013           | 0.0325    | 0.0039    | 0.261  | 0.0342        | 0.0751  | 0.0096  | 0.125       |
| REL1       | 19    | 6802               | 363            | 0.016           | 0.0226    | 0.0024    | 0.238  | 0.03          | 0.0493  | 0.0055  | 0.108       |
| REL2       | 19    | 5075               | 311            | 0.013           | 0.0288    | 0.0038    | -0.912 | 0.0151        | 0.0338  | 0.004   | 0.116       |
| STAT-A     | 20    | 2740               | 55             | 0.0042          | 0.0064    | 0         | -1.111 | 0.0221        | 0.0268  | 0       | 0           |
| STAT-B     | 19    | 2123               | 15             | 0.0018          | 0.0021    | 0.0015    | -1.025 | 0.0377        | 0.0627  | 0.0295  | 0.46        |
| TAK1       | 20    | 5409               | 395            | 0.0163          | 0.037     | 0.0023    | -0.819 | 0.0359        | 0.0506  | 0.0044  | 0.084       |
| TOLL       | 20    | 3595               | 40             | 0.0017          | 0.0054    | 0.0004    | -1.802 | 0.0225        | 0.066   | 0.0065  | 0.094       |
| TRAF6      | 20    | 1814               | 53             | 0.0048          | 0.0079    | 0.0023    | -1.713 | 0.0574        | 0.1132  | 0.0181  | 0.149       |
| TUBE       | 18    | 2285               | 110            | 0.0156          | 0.0365    | 0.0087    | 0.081  | 0.0305        | 0.0711  | 0.0131  | 0.176       |
| AGAP000102 | 20    | 3500               | 131            | 0.0078          | 0.0104    | 0.0034    | -1.218 | 0.0498        | 0.0388  | 0.0145  | 0.368       |
| AGAP000994 | 20    | 2519               | 47             | 0.0027          | 0.0049    | 0.0001    | -1.98  | 0.0288        | 0.0477  | 0.0019  | 0.039       |
| AGAP002961 | 20    | 4700               | 237            | 0.0116          | 0.0315    | 0.0017    | -0.58  | 0.0208        | 0.0504  | 0.0032  | 0.062       |
| AGAP003073 | 20    | 1768               | 115            | 0.0152          | 0.0241    | 0.0003    | -0.743 | 0.0393        | 0.0895  | 0.0033  | 0.035       |
| AGAP004474 | 19    | 2363               | 150            | 0.0181          | 0.0282    | 0.0013    | -0.077 | 0.0442        | 0.0579  | 0.0031  | 0.052       |
| AGAP004969 | 20    | 1653               | 64             | 0.009           | 0.0209    | 0.0034    | -0.753 | 0.022         | 0.0594  | 0.0053  | 0.086       |
| AGAP005327 | 19    | 1088               | 54             | 0.0102          | 0.0208    | 0.0007    | -1.107 | 0.0099        | 0.0117  | 0.0003  | 0.029       |
| AGAP005945 | 19    | 2553               | 183            | 0.0169          | 0.0367    | 0.0016    | -0.678 | 0.0487        | 0.0562  | 0.0027  | 0.046       |
| AGAP006357 | 20    | 3166               | 213            | 0.0183          | 0.0336    | 0.0013    | -0.086 | 0.034         | 0.0728  | 0.0065  | 0.085       |
| AGAP006757 | 20    | 5014               | 409            | 0.0183          | 0.0204    | 0.0004    | -0.868 | 0.0489        | 0.0406  | 0.0002  | 0.005       |
| AGAP007178 | 20    | 1699               | 84             | 0.0105          | 0.0253    | 0.0017    | -1.017 | 0.0203        | 0.0424  | 0.0032  | 0.074       |
| AGAP007957 | 20    | 4364               | 317            | 0.0158          | 0.0293    | 0.0029    | -0.915 | 0.0287        | 0.0666  | 0.0065  | 0.094       |
| AGAP009172 | 19    | 2826               | 125            | 0.0115          | 0.0242    | 0.0006    | -0.4   | 0.0269        | 0.0492  | 0.0021  | 0.042       |
| AGAP009518 | 19    | 4695               | 411            | 0.021           | 0.0253    | 0.0021    | -0.709 | 0.039         | 0.0267  | 0.0014  | 0.051       |
| AGAP010415 | 20    | 1275               | 25             | 0.0035          | 0.0117    | 0.0011    | -1.188 | 0.0271        | 0.0947  | 0.0021  | 0.02        |
| AGAP011321 | 20    | 1566               | 89             | 0.0142          | 0.0376    | 0.005     | -0.381 | 0.0318        | 0.0809  | 0.0134  | 0.158       |
| AGAP011689 | 20    | 1684               | 96             | 0.0153          | 0.041     | 0.0003    | -0.132 | 0.022         | 0.0414  | 0.0029  | 0.067       |

<sup>a</sup>Number of *A. coluzzii* alleles sampled<sup>b</sup>Number of base pairs sequenced per allele<sup>c</sup>Number of segregating sites<sup>d</sup>Pairwise genetic diversity calculated for all sites<sup>e</sup>Pairwise genetic diversity calculated for synonymous sites

<sup>†</sup>Pairwise genetic diversity calculated for nonsynonymous sites  
<sup>‡</sup>Tajima's D calculated using silent sites.  
<sup>††</sup>Pairwise divergence at all sites between *A. coluzzii* and *A. merus*  
<sup>†††</sup>Pairwise silent divergence between *A. coluzzii* and *A. merus*  
<sup>††††</sup>Pairwise replacement divergence between *A. coluzzii* and *A. merus*  
<sup>†††††</sup>K<sub>A</sub>/K<sub>S</sub> ratio between *A. coluzzii* and *A. merus*
