# Supplementary material for: Population Genetics of Anopheles coluzzii Immune Pathways and Genes
Source: PubMed Central journal article supplement (PMC4349087; doi:10.1534/g3.114.014845), 2014-12-30
Supplement: supp_g3.114.014845_FigureS1.pdf [file supp_g3.114.014845_FigureS1.pdf]

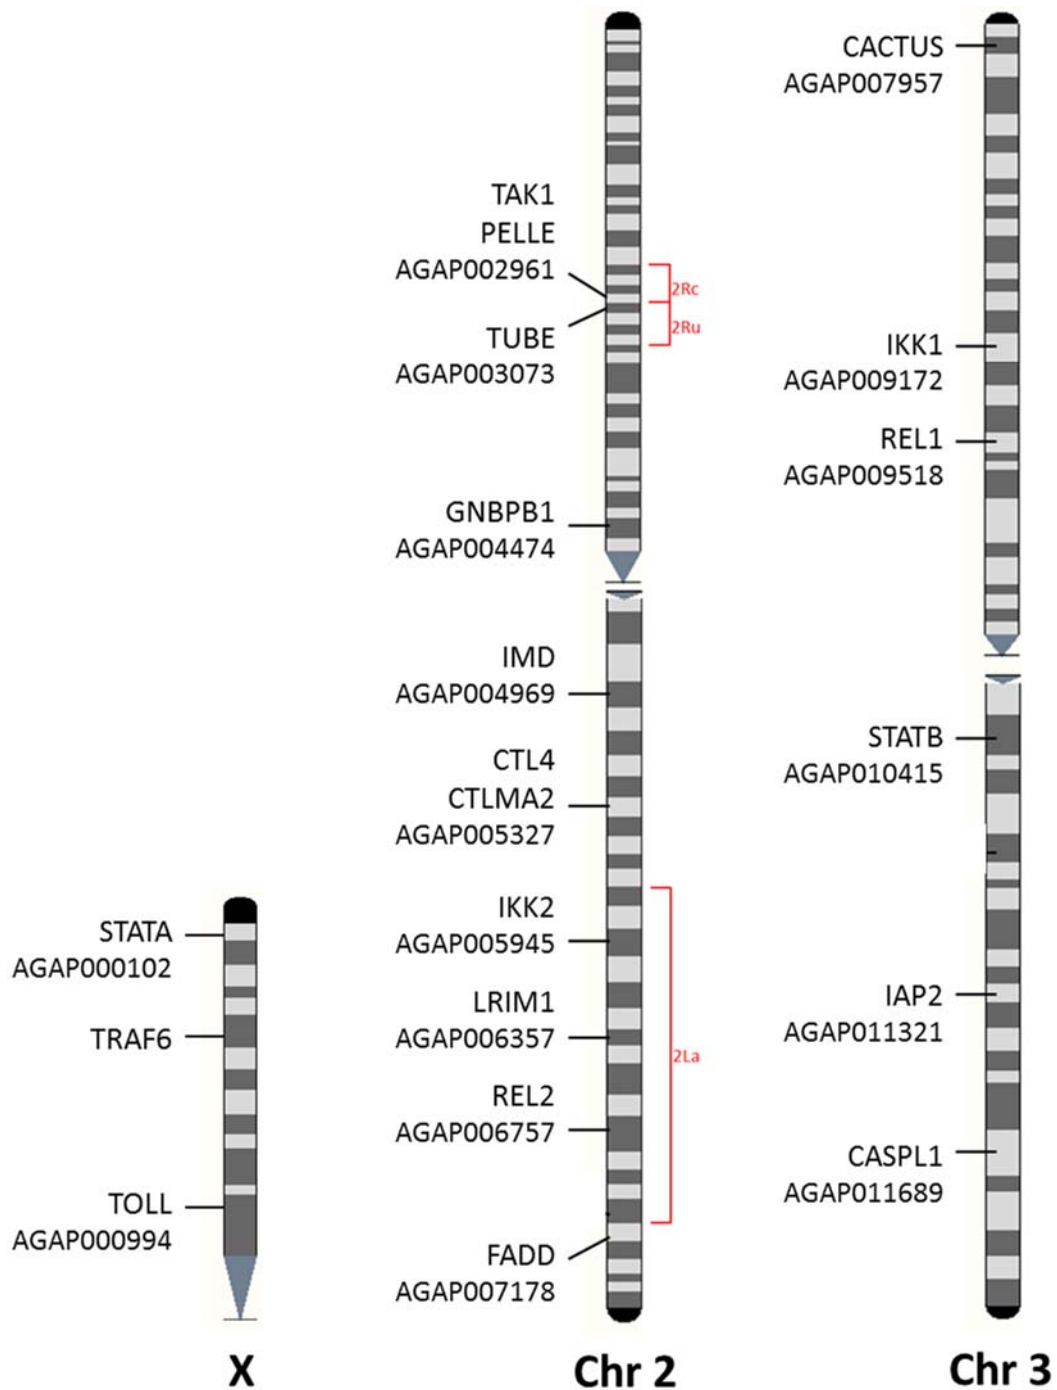

**Figure S1** Approximate chromosomal locations of loci sampled. AGAP identifiers are provided for all non-immune control loci. Control loci are located within 40-100KB of their “matched” controls. Positions of chromosomal inversions are shown in red.
